# Supplementary material for: Polyethylene glycol-based biocompatible and highly stable superparamagnetic iron oxide nanoclusters for magnetic resonance imaging
Source: Royal Society of Chemistry journal article supplement (doi:10.1039/c2jm32086j), 2012-01-01
Supplement: c2jm32086j.pdf [file c2jm32086j.pdf]

# Supporting Information

## Polyethylene glycol-based Biocompatible and Highly Stable Superparamagnetic Iron Oxide Nanoclusters for Magnetic Resonance Imaging

Syu-Ming Lai,<sup>a</sup> Jong-Kai Hsiao,<sup>b</sup> Hsiu-Ping Yu,<sup>a</sup> Chen-Wen Lu,<sup>b</sup> Chih-Chia Huang,<sup>c</sup>  
Ming-Jium Shieh,<sup>d</sup> and Ping-Shan Lai<sup>a\*</sup>

<sup>a</sup>Department of Chemistry, National Chung Hsing University, Taichung 402, Taiwan

<sup>b</sup>Department of Medical Imaging, Buddhist Tzu Chi General Hospital, Taipei Branch,  
New Taipei City 231, Taiwan

<sup>c</sup>Biophotonics Interdisciplinary Research Center and Institute of Biophotonics,  
National Yang-Ming University, Taipei 112, Taiwan

<sup>d</sup>Institute of Biomedical Engineering, National Taiwan University, Taipei 100,  
Taiwan

\*Corresponding author: Ping-Shan Lai

Department of Chemistry, National Chung Hsing University

No. 250, Kuo-Kuang Road, Taichung 402, Taiwan.

Tel: +886-4-22840411 ext. 428. Fax: +886-4-22862547.

*E-mail address:* [pslai@email.nchu.edu.tw](mailto:pslai@email.nchu.edu.tw) (P.-S. Lai)

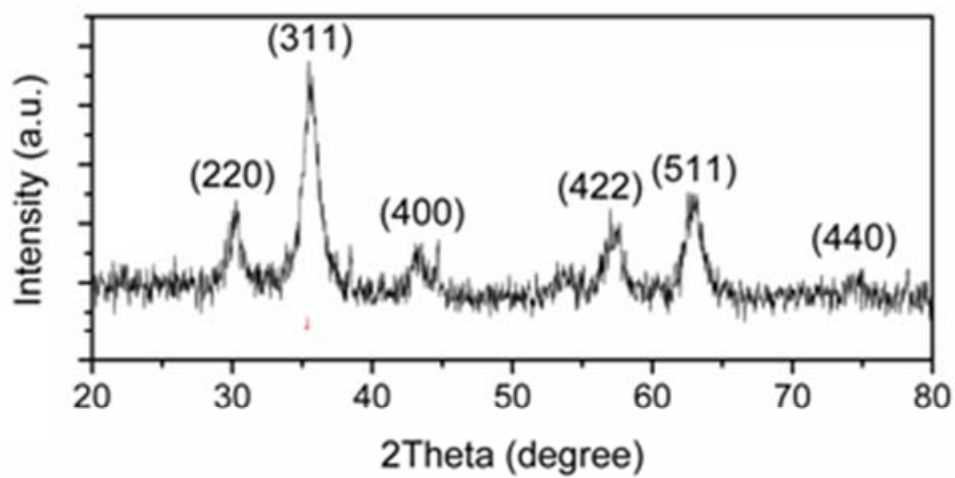

Figure S1: XRD measurement of as-prepared iron oxide nanoparticles.

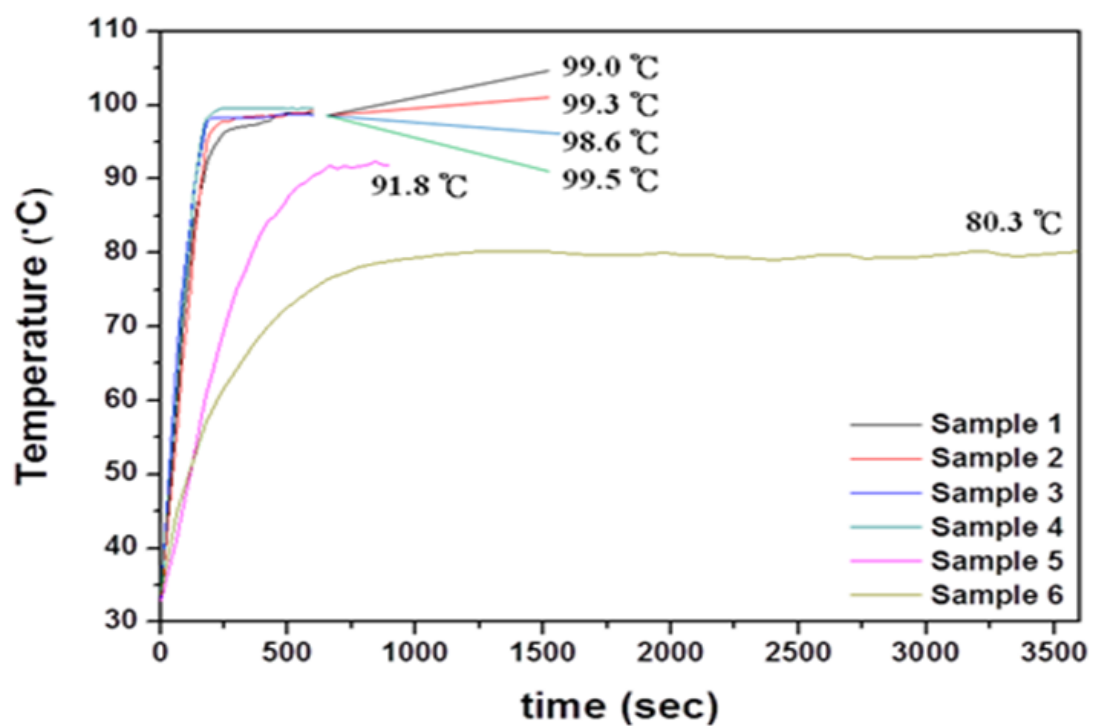

Fig. S2: Temperature monitoring of each reaction for the preparation of sample 1 to 6 by thermocouple.

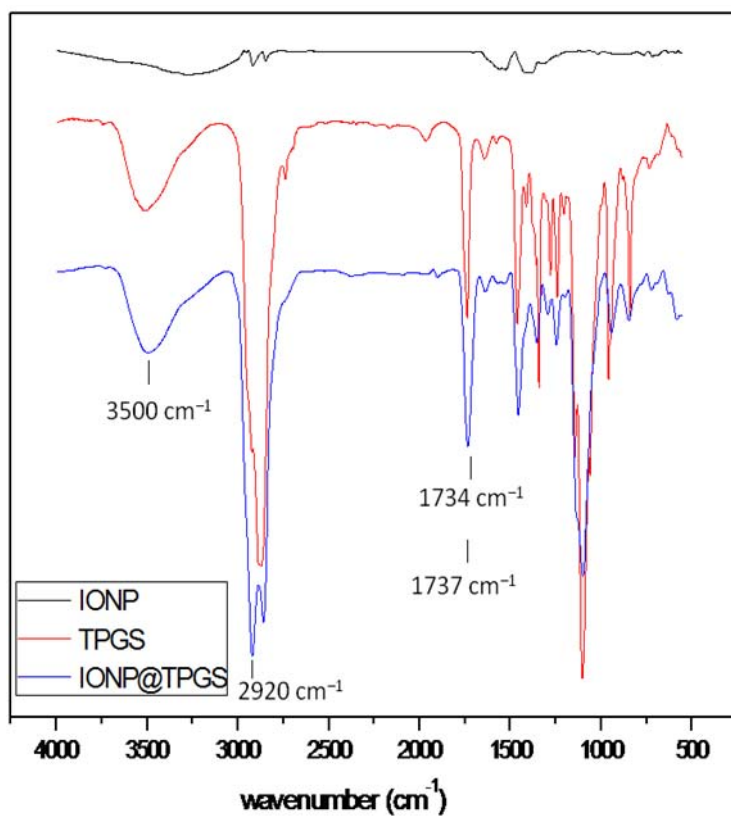

Figure S3: FT-IR spectra of IONP, TPGS and IONP@TPGS clusters.

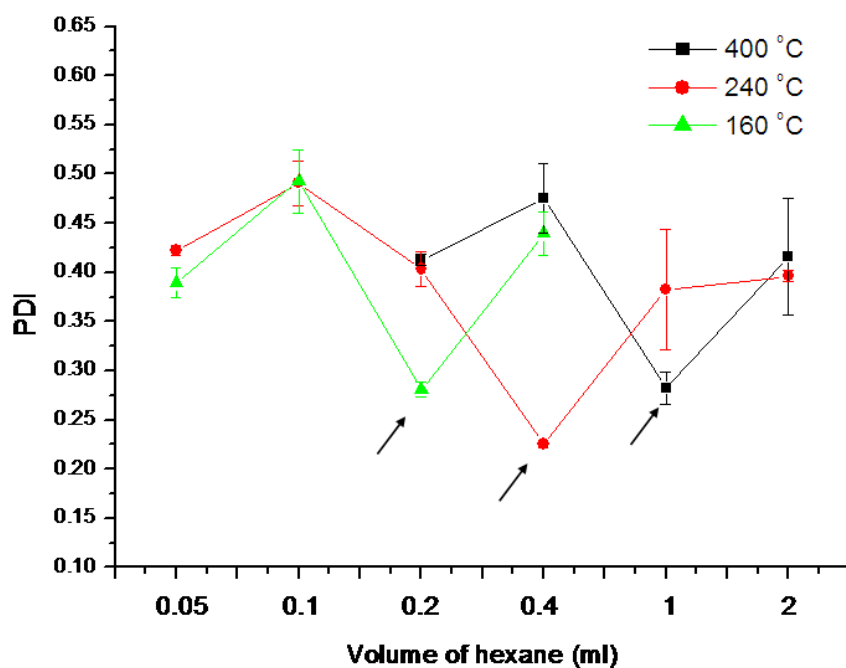

Figure S4: The relationship between PDI and volume of hexane for IONP@TPGS clusters formation at different hotplate temperature.

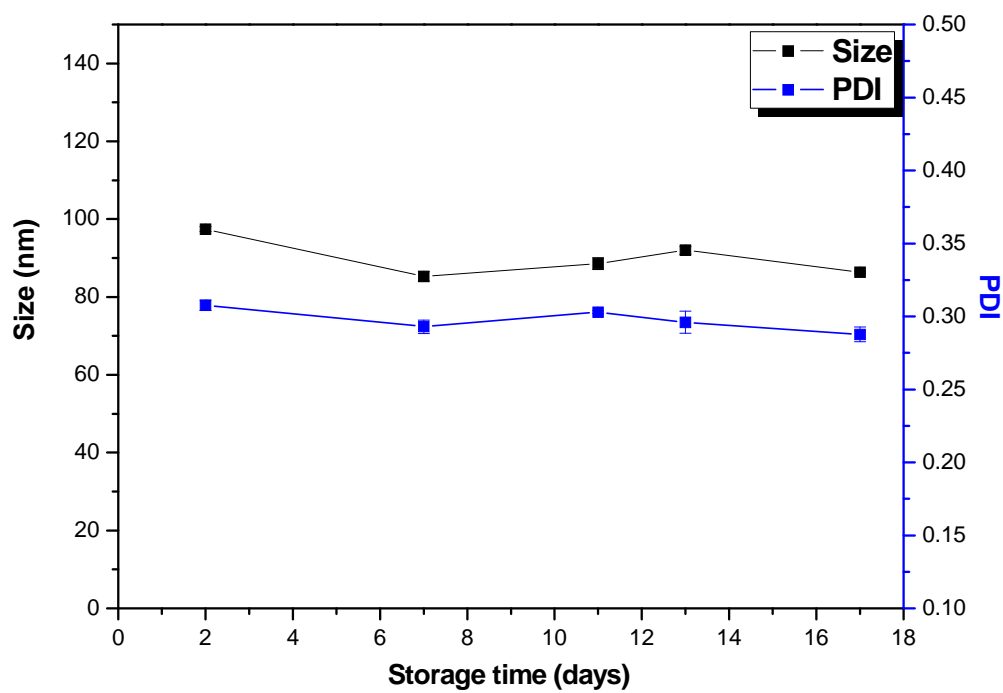

Figure S5: Size monitoring of IONP@TPGS clusters (sample 6) by DLS at room temperature.
